# Supplementary material for: Imetelstat-mediated alterations in fatty acid metabolism to induce ferroptosis as a therapeutic strategy for acute myeloid leukemia
Source: PubMed Central journal article supplement (PMC10824665; doi:10.1038/s43018-023-00653-5), 2023-10-30
Supplement: 43018_2023_653_MOESM1_ESM.pdf [file 43018_2023_653_MOESM1_ESM.pdf]

---

# Imetelstat-mediated alterations in fatty acid metabolism to induce ferroptosis as a therapeutic strategy for acute myeloid leukemia

---

In the format provided by the authors and unedited

---

## SUPPLEMENTARY FIGURES

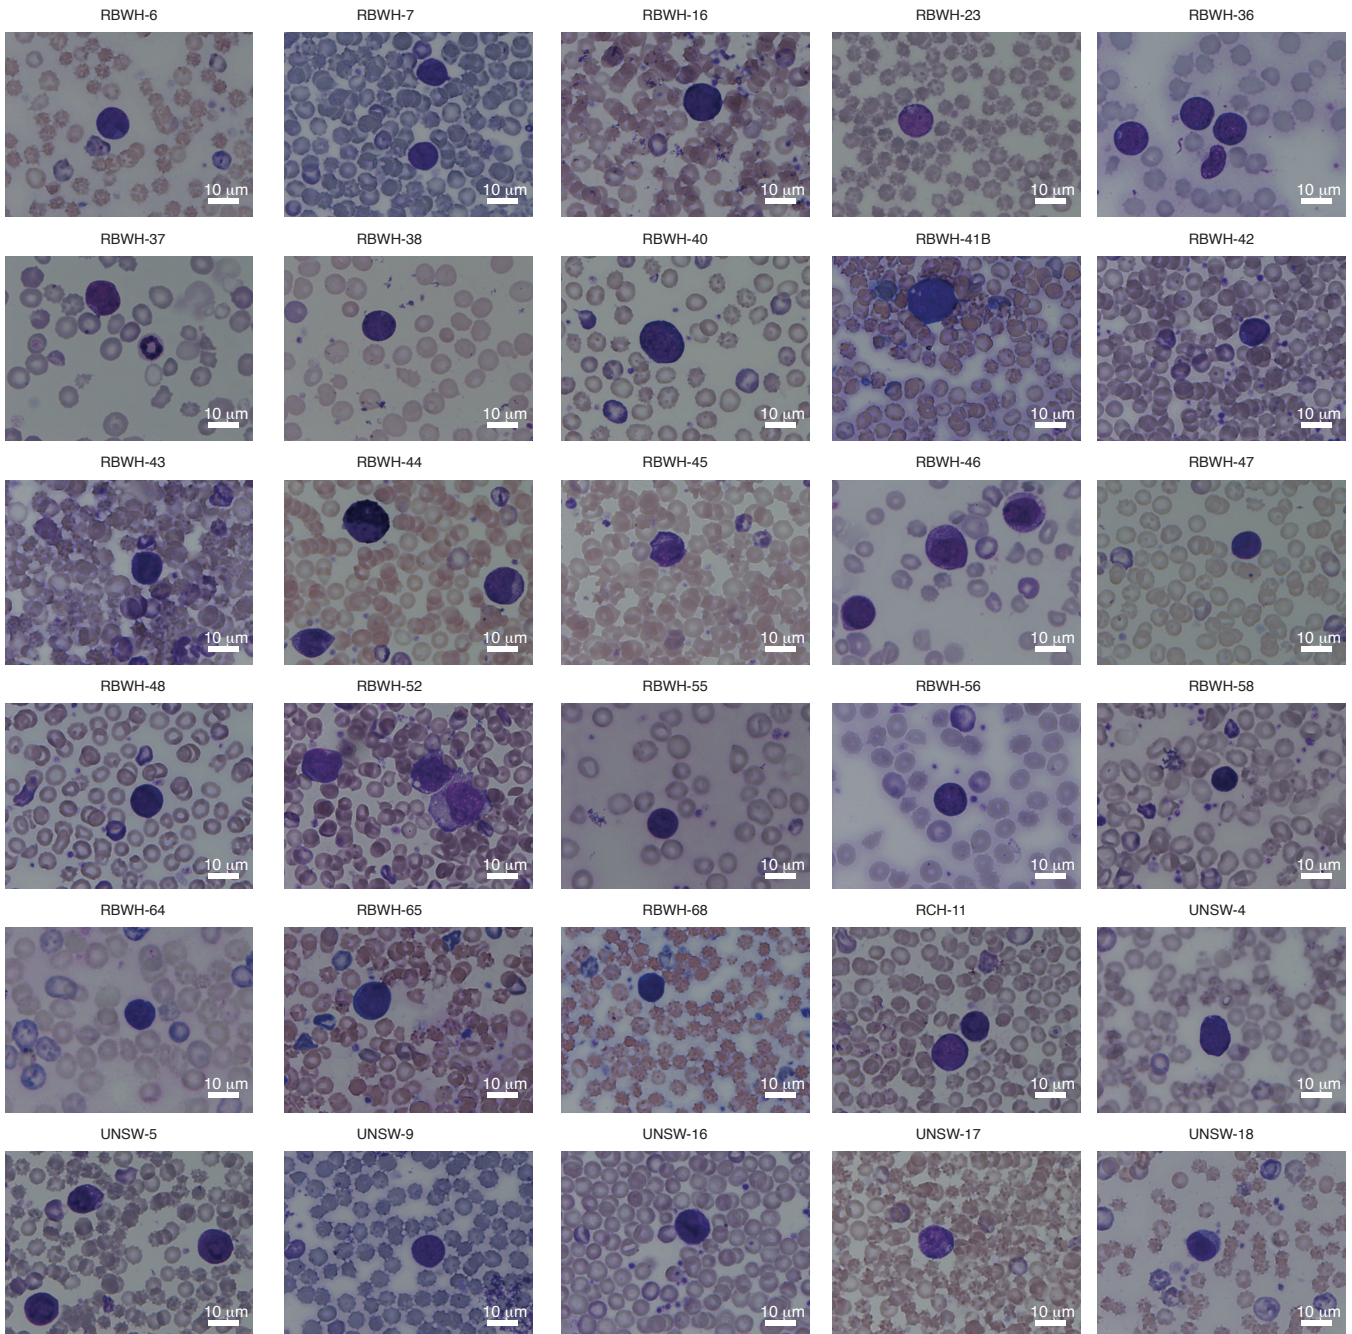

**Supplementary Fig.1 | Peripheral blood blast morphology in successfully established AML PDX. Wright-Giemsa stainings were performed on peripheral blood smears from each of n = 30 individual AML PDX models.**

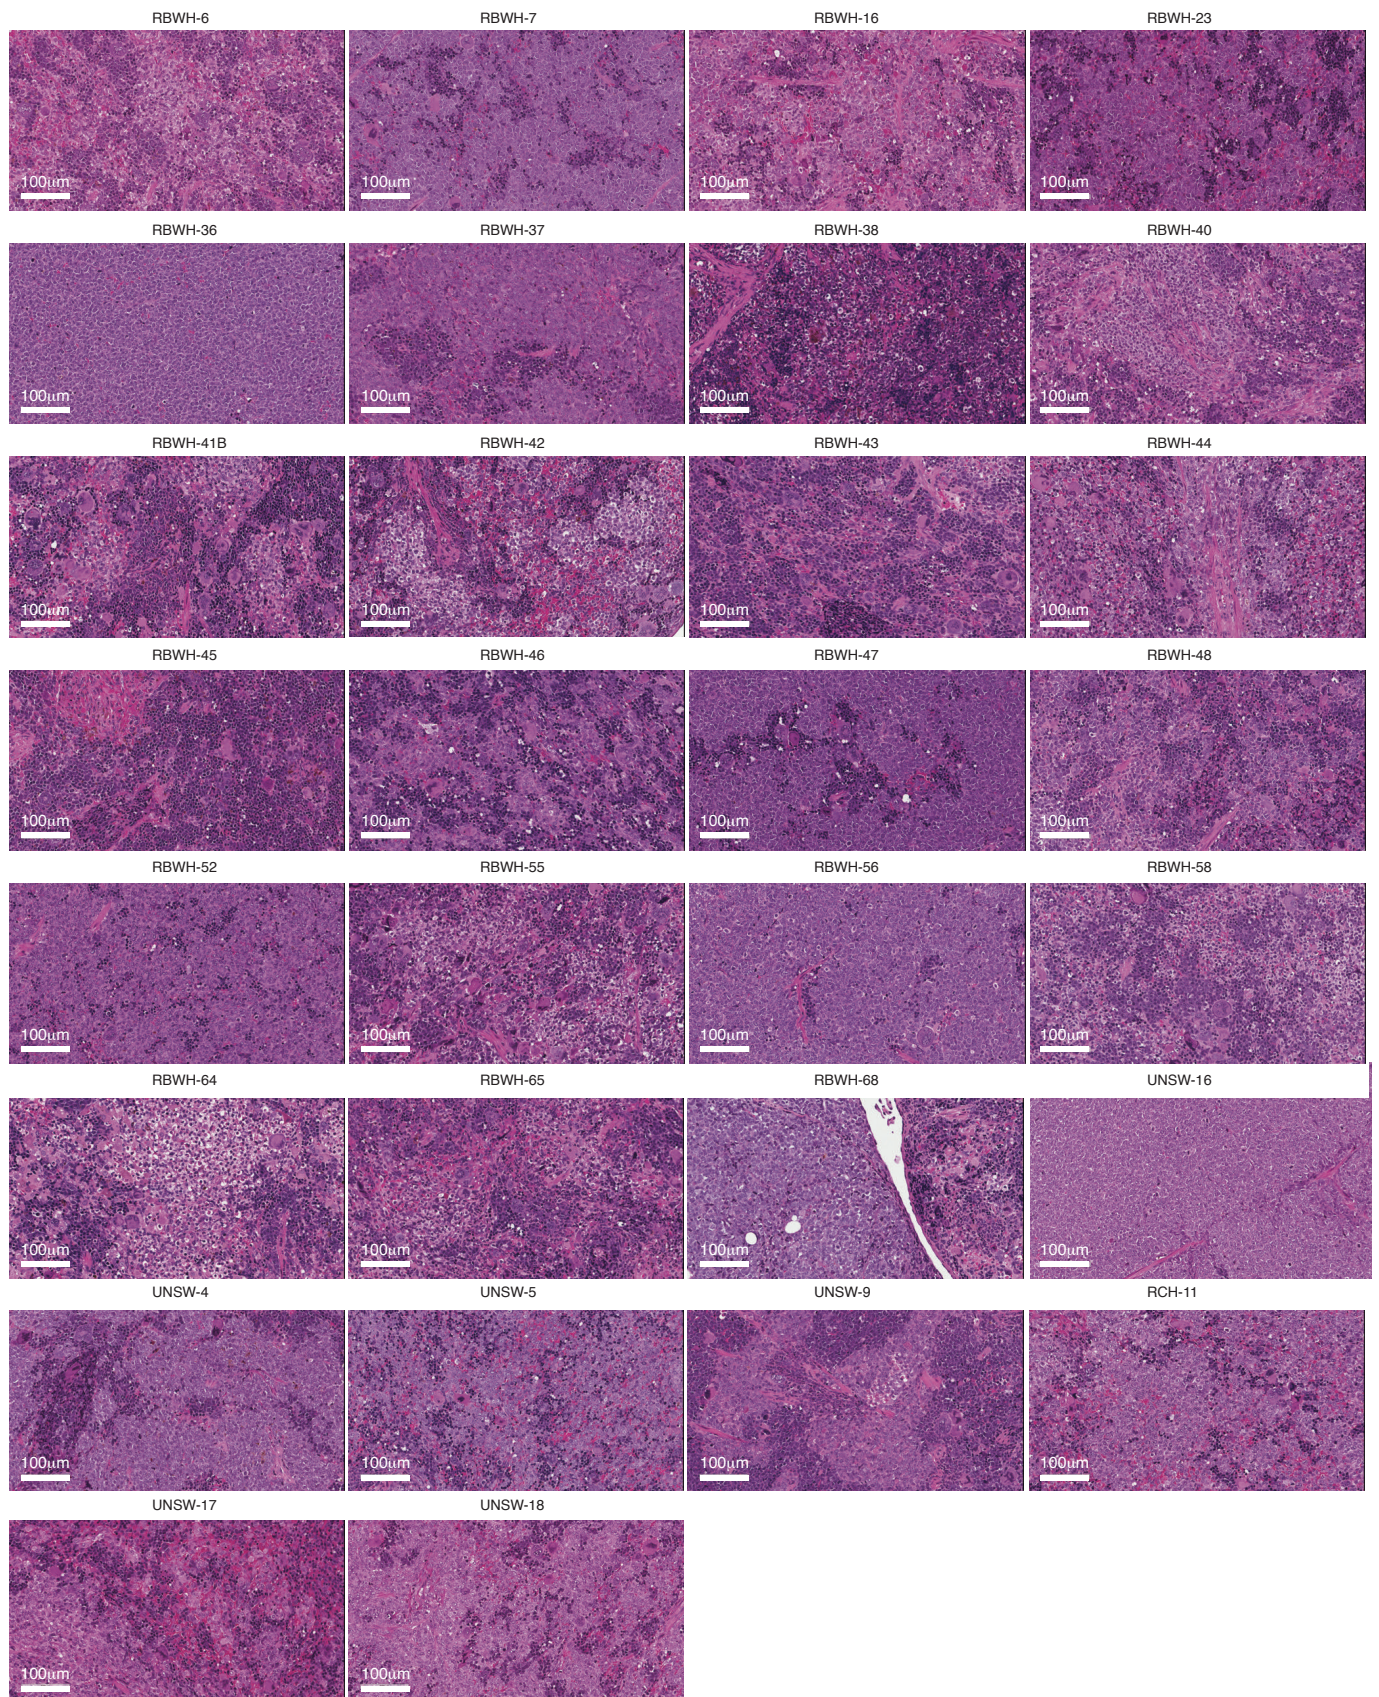

**Supplementary Fig.2 | Splenic AML infiltration in successfully generated PDX. Hematoxylin & Eosin stainings were performed on splenic sections from each of n = 30 individual AML PDX models.**

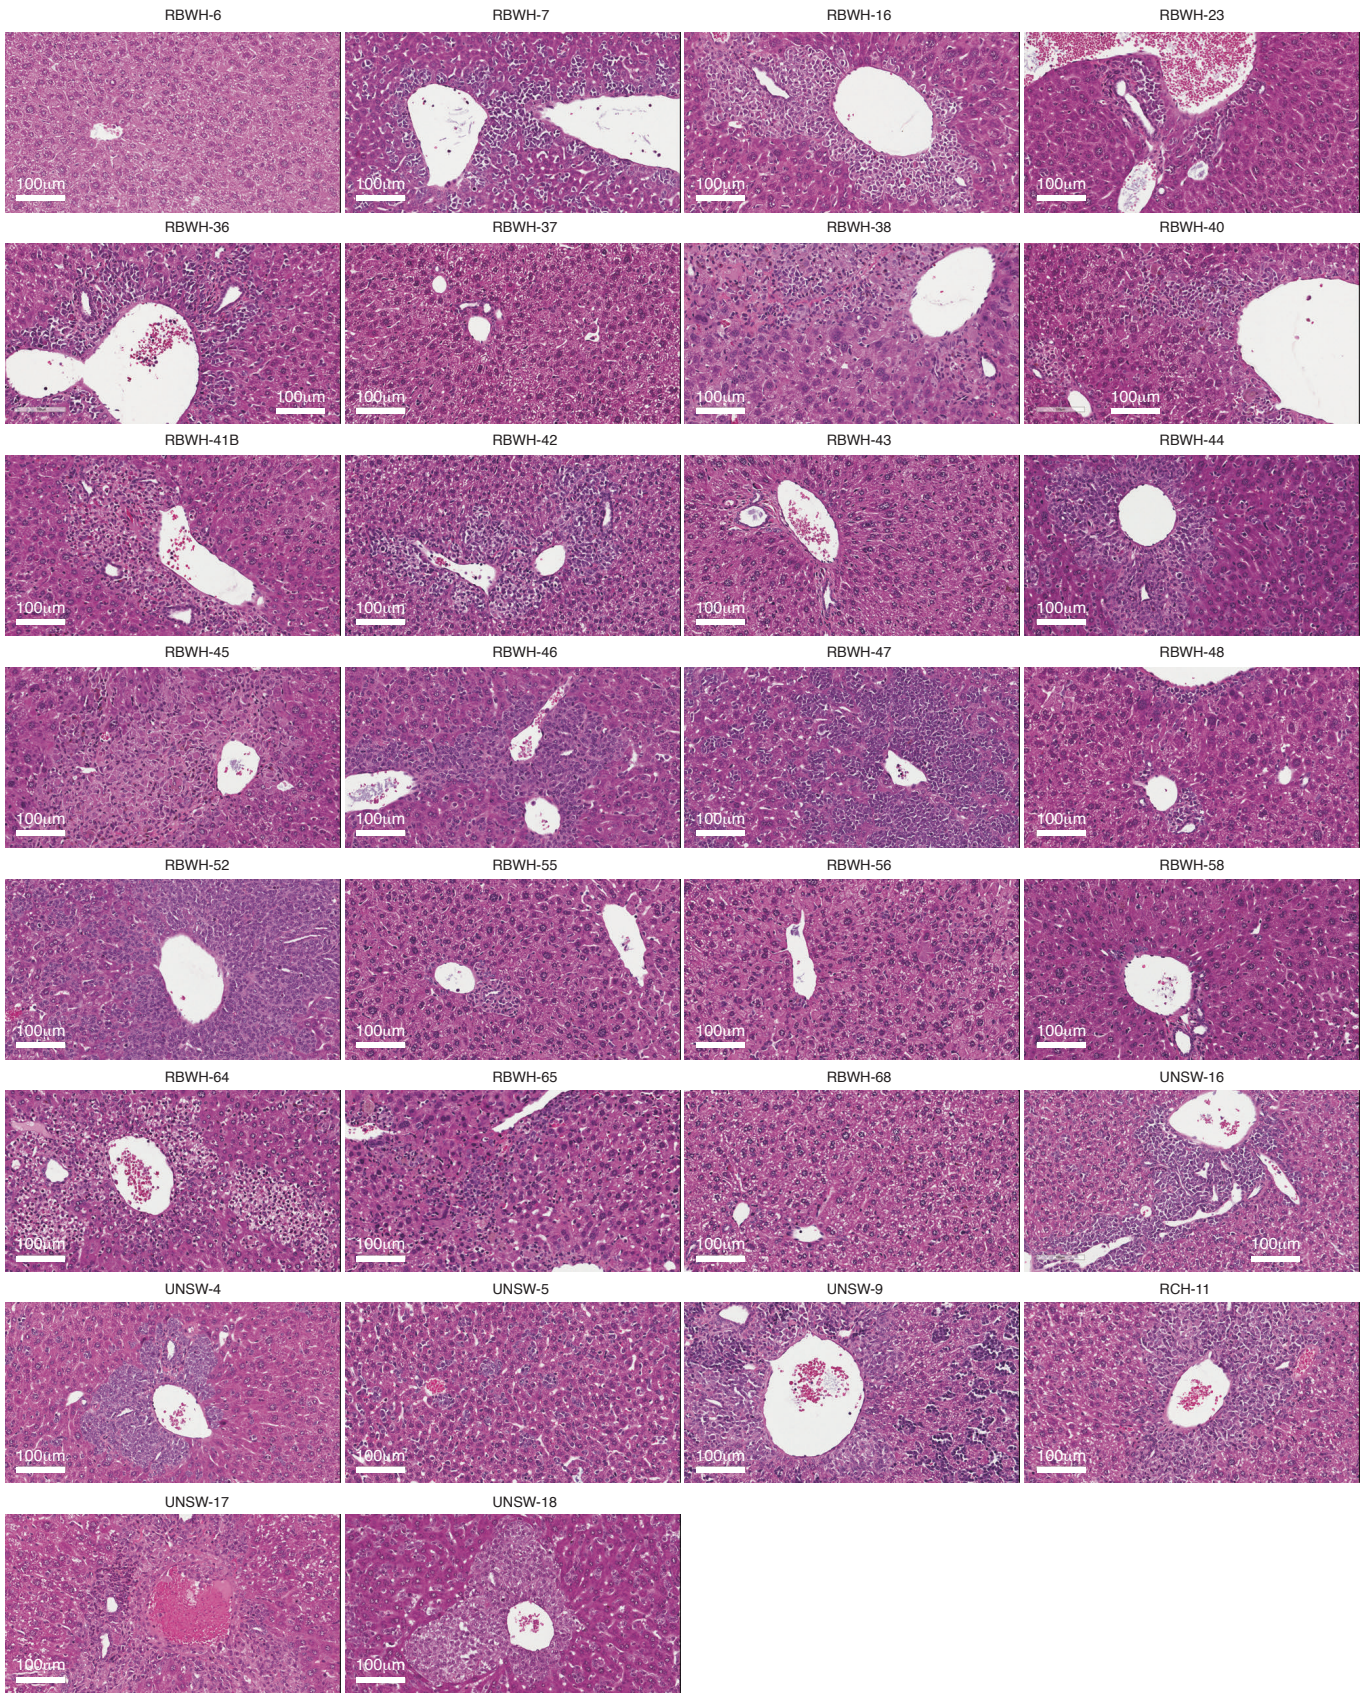

**Supplementary Fig.3 | Hepatic AML infiltration in successfully generated PDX. Hematoxylin & Eosin stainings were performed on liver sections from each of n = 30 individual AML PDX models.**

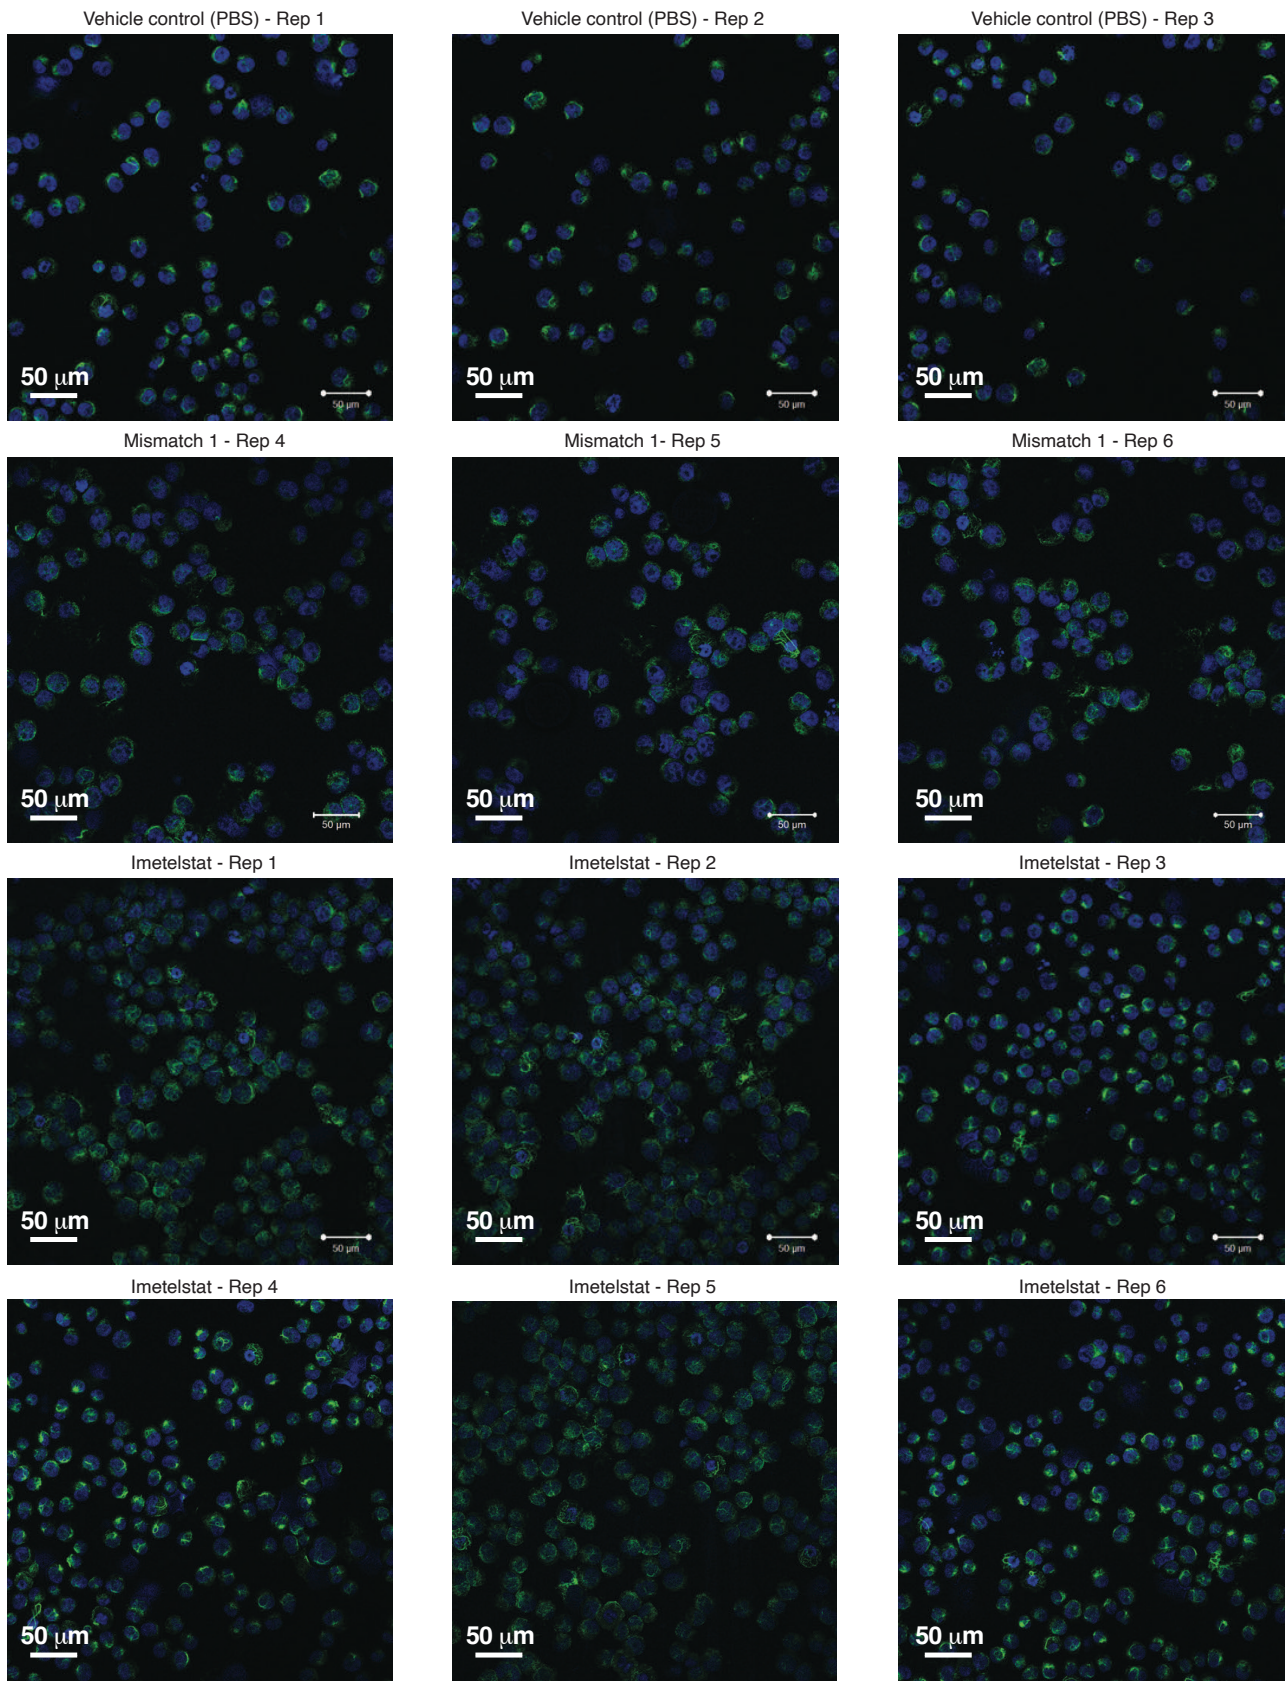

**Supplementary Fig.4 | Vimentin expression in AML cell lines.**  
**Confocal microscopy on vimentin in NB4 cells treated with vehicle control (PBS) or imetelstat (4 microM) for 24 hours. N = 6 independent biological replicates per condition.**
