# Supplementary material for: Imetelstat-mediated alterations in fatty acid metabolism to induce ferroptosis as a therapeutic strategy for acute myeloid leukemia
Source: PubMed Central journal article supplement (PMC10824665; doi:10.1038/s43018-023-00653-5), 2023-10-30

Western blot analysis of ACSL4 in loss-of-function edited NB4 cells

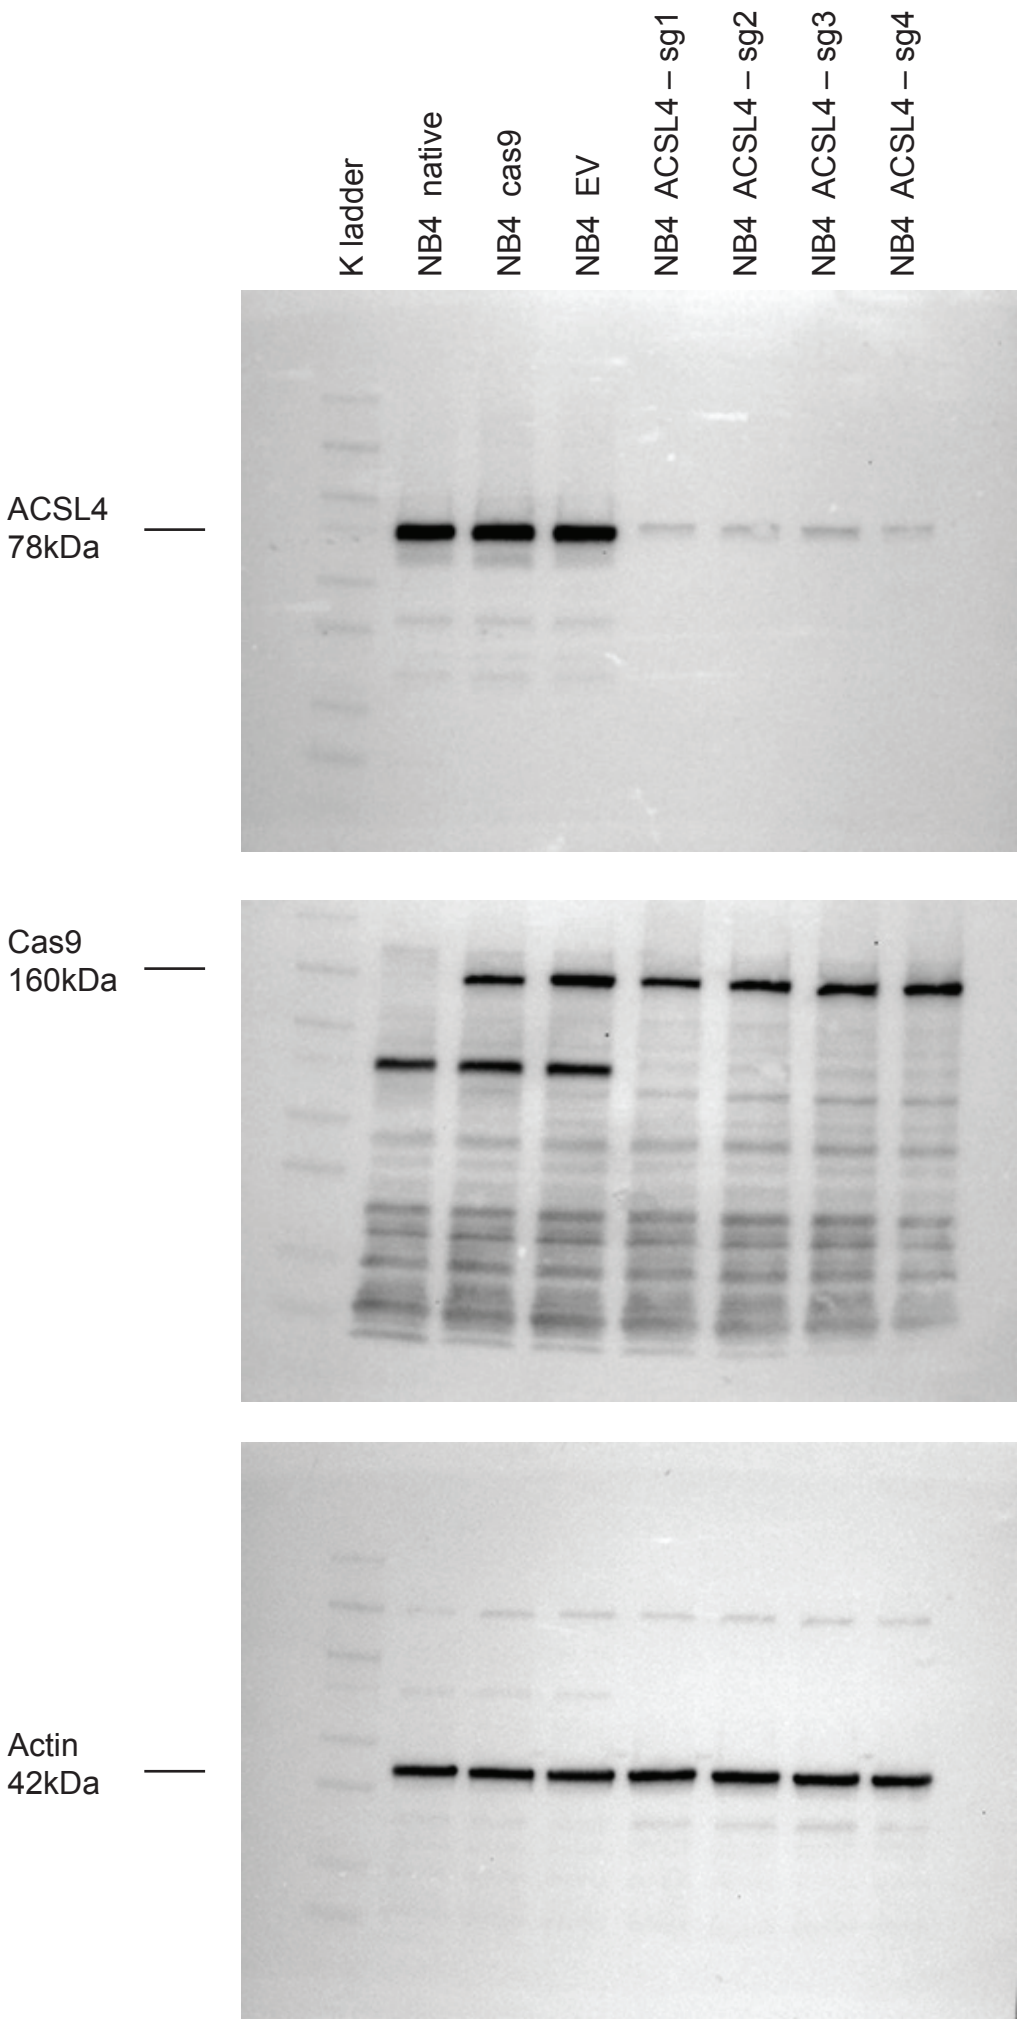



Western blot analysis of ACSL4 in loss-of-function edited KO52 cells

K ladder  
KO52 native  
KO52 cas9  
KO52 EV  
KO52 ACSL4 – sg1  
KO52 ACSL4 – sg2  
KO52 ACSL4 – sg3  
KO52 ACSL4 – sg4

ACSL4  
78kDa

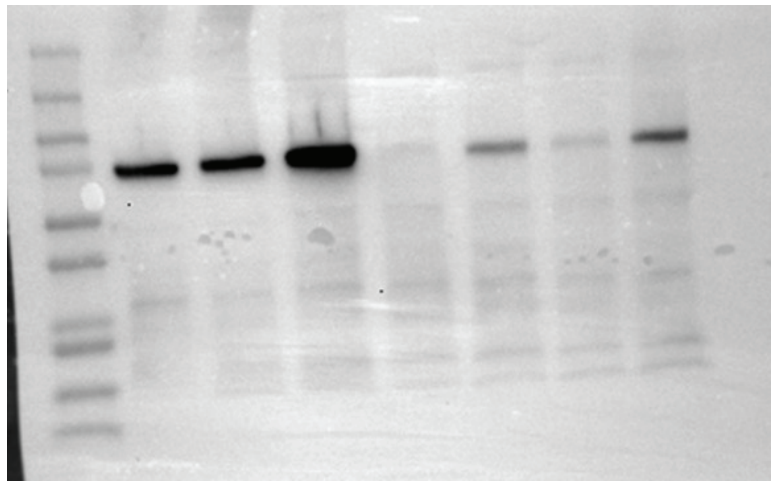

Cas9  
160kDa

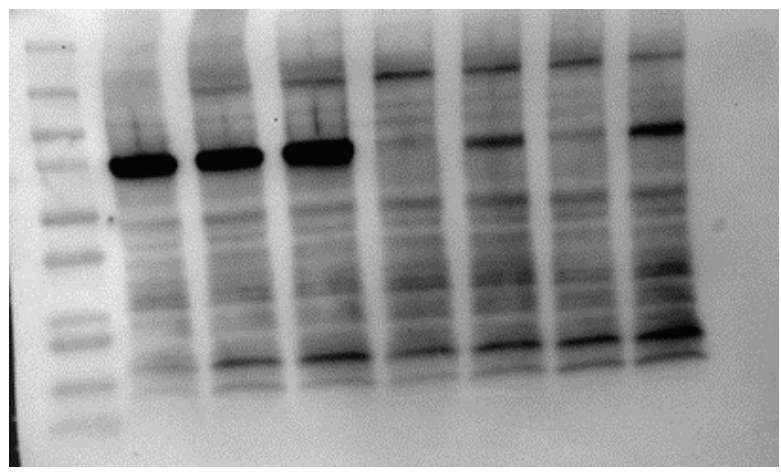

Actin  
42kDa

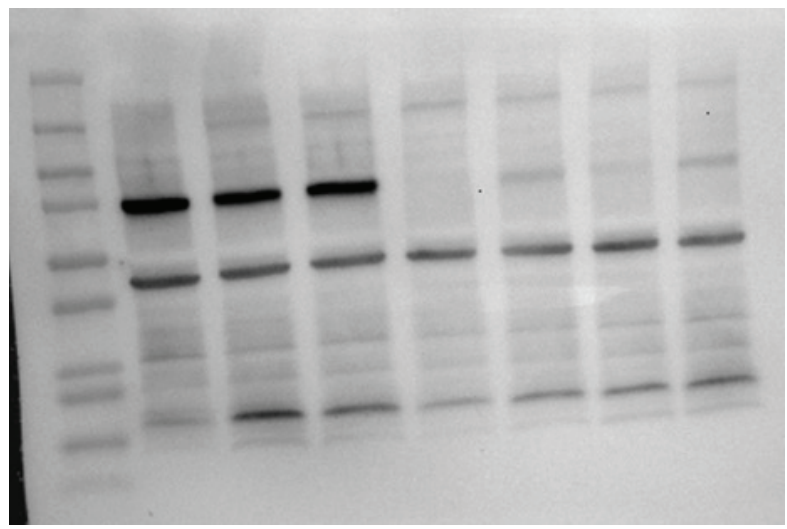

Western blot analysis of ACSL4 in loss-of-function edited MV411 cells

K ladder  
MV411 native  
MV411 cas9  
MV411 EV  
MV411 ACSL4 – sg1  
MV411 ACSL4 – sg2  
MV411 ACSL4 – sg3  
MV411 ACSL4 – sg4

ACSL4  
78kDa

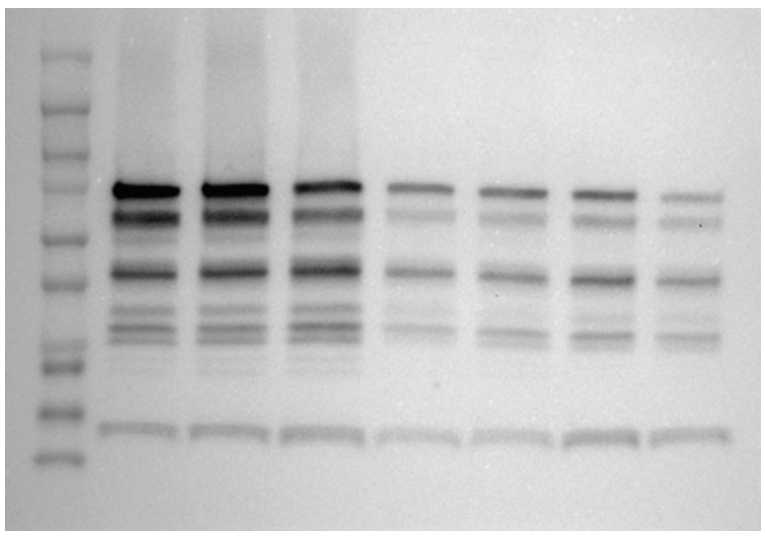

Cas9  
160kDa

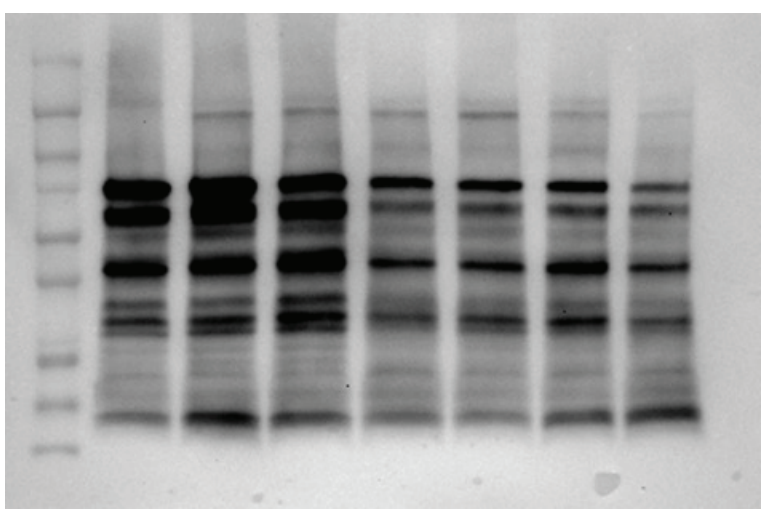

Actin  
42kDa

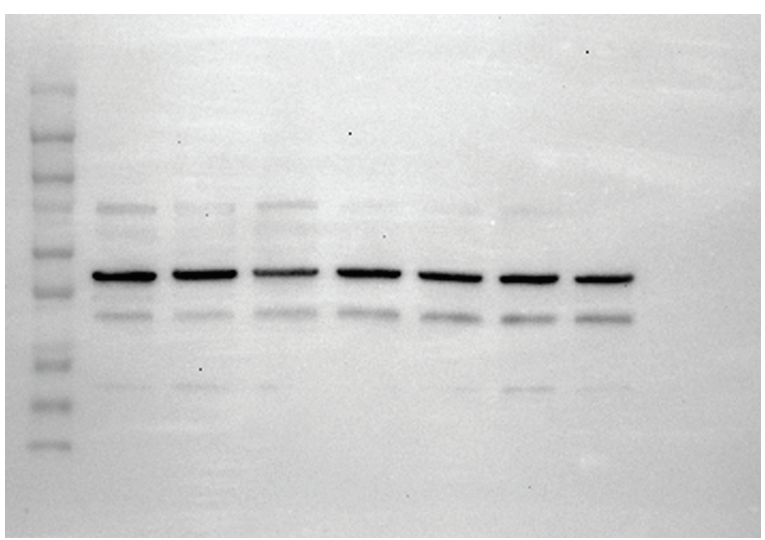

Supplement: 43018_2023_653_MOESM17_ESM.pdf [file 43018_2023_653_MOESM17_ESM.pdf]
